# Supplementary material for: Association of PM2.5 and Its Chemical Compositions with Metabolic Syndrome: A Nationwide Study in Middle-Aged and Older Chinese Adults
Source: MDPI journal article supplement (doi:10.3390/ijerph192214671), 2022-11-08
Supplement: s1 [file s1]

**Table S1. The definition of the MetS from different organization.**

| Index | Population | China                                     | NCEP/ATP III                                                                | AHA                                                                         | CDS                                                                                | IDF                                                                              |
|-------|------------|-------------------------------------------|-----------------------------------------------------------------------------|-----------------------------------------------------------------------------|------------------------------------------------------------------------------------|----------------------------------------------------------------------------------|
| WC    | Men        | >85cm                                     | >90cm                                                                       | >102cm                                                                      | >90cm                                                                              | >94cm                                                                            |
|       | Women      | >80cm                                     | >80cm                                                                       | >88cm                                                                       | >85cm                                                                              | >80cm                                                                            |
| BP    | All        | SBP $\geq$ 130 mmHg or DBP $\geq$ 85 mmHg | SBP $\geq$ 130 mmHg or DBP $\geq$ 85 mmHg or on antihypertensive medication | SBP $\geq$ 130 mmHg or DBP $\geq$ 85 mmHg or on antihypertensive medication | SBP $\geq$ 130 mmHg or DBP $\geq$ 85 mmHg or diagnosed hypertension                | SBP $\geq$ 130 mmHg or DBP $\geq$ 85 mmHg or taking anti-hypertensive medication |
| FBG   | All        | >100 mg/dL                                | $\geq$ 150 mg/dL or antidiabetic medication                                 | $\geq$ 100 mg/dL or antidiabetic medication                                 | FBG $\geq$ 100 mg/dL or 2h-glucose $\geq$ 140 mg/dL or diagnosed diabetes mellitus | $\geq$ 100 mg/dL or taking antidiabetic medication                               |
| FTG   | All        | >150 mg/dL                                | $\geq$ 150 mg/dL or on medication for elevated TG                           | $\geq$ 150 mg/dL or on medication for elevated TG                           | $\geq$ 150 mg/dL                                                                   | $\geq$ 150 mg/dL or taking medication for reduced TG                             |
| HDL-C | Men        | <40 mg/dL                                 | <40 mg/dL or taking medication for reduced HDL-C                            | <40 mg/dL or taking medication for reduced HDL-C                            | <40 mg/dL                                                                          | <40 mg/dL or taking medication for reduced HDL-C                                 |
|       | Women      | <50 mg/dL                                 | <50 mg/dL or taking medication for reduced HDL-C                            | <50 mg/dL or taking medication for reduced HDL-C                            | <40 mg/dL                                                                          | <50 mg/dL or taking medication for reduced HDL-C                                 |

Abbreviations: NCEP/ATP III, the US National Cholesterol Education Programme Adult Treatment Panel III guidelines; AHA, American Heart Association; CDS, Chinese Diabetes Society; IDF, the International Diabetes Federation; SBP, systolic blood pressure; DBP, diastolic blood pressure; FBG, fasting blood glucose; HDL-C, high density lipoprotein cholesterol; MetS, metabolic syndrome; FTG, fasting triglyceride; WC, waist circumference. MetS was defined as if a participant presented with three or more of the abovementioned risk factors.

**Table S2. The average concentration of the PM<sub>2.5</sub> and its chemical constituent in different exposure window.**

| Air pollutants                | Mean  | SD    | Min   | P <sub>5</sub> | P <sub>25</sub> | Median | P <sub>75</sub> | P <sub>95</sub> | Max    | Lag |
|-------------------------------|-------|-------|-------|----------------|-----------------|--------|-----------------|-----------------|--------|-----|
| PM <sub>2.5</sub>             | 52.12 | 21.62 | 18.38 | 22.30          | 34.30           | 48.44  | 65.92           | 90.59           | 97.66  | 2y  |
| BC                            | 2.51  | 0.77  | 0.93  | 1.30           | 1.90            | 2.35   | 3.10            | 3.83            | 4.20   | 2y  |
| NH <sub>4</sub> <sup>+</sup>  | 7.86  | 3.41  | 2.61  | 2.93           | 4.90            | 7.55   | 10.37           | 13.64           | 14.37  | 2y  |
| NO <sub>3</sub> <sup>-</sup>  | 11.29 | 5.58  | 3.07  | 3.37           | 6.44            | 10.49  | 15.51           | 20.82           | 21.95  | 2y  |
| OM                            | 12.61 | 4.65  | 4.70  | 5.73           | 8.94            | 12.00  | 15.80           | 21.60           | 22.80  | 2y  |
| SO <sub>4</sub> <sup>2-</sup> | 9.75  | 3.69  | 2.91  | 4.65           | 6.78            | 9.42   | 12.63           | 16.15           | 17.11  | 2y  |
| PM <sub>2.5</sub>             | 54.16 | 22.69 | 17.89 | 22.53          | 36.05           | 51.24  | 70.29           | 94.29           | 101.29 | 3y  |
| BC                            | 2.63  | 0.82  | 0.92  | 1.33           | 1.98            | 2.48   | 3.31            | 3.93            | 4.39   | 3y  |
| NH <sub>4</sub> <sup>+</sup>  | 8.15  | 3.59  | 2.52  | 2.94           | 4.96            | 7.89   | 10.89           | 14.14           | 14.85  | 3y  |
| NO <sub>3</sub> <sup>-</sup>  | 11.66 | 5.86  | 3.01  | 3.36           | 6.53            | 11.01  | 16.21           | 21.74           | 22.70  | 3y  |
| OM                            | 13.03 | 4.86  | 4.56  | 5.68           | 9.17            | 12.45  | 16.81           | 21.91           | 23.54  | 3y  |
| SO <sub>4</sub> <sup>2-</sup> | 10.24 | 3.95  | 2.85  | 4.61           | 7.07            | 10.17  | 13.66           | 16.92           | 17.75  | 3y  |
| PM <sub>2.5</sub>             | 54.93 | 23.02 | 18.18 | 22.69          | 36.53           | 51.29  | 71.12           | 95.56           | 102.88 | 4y  |
| BC                            | 2.69  | 0.84  | 0.94  | 1.33           | 2.03            | 2.53   | 3.44            | 4.09            | 4.46   | 4y  |
| NH <sub>4</sub> <sup>+</sup>  | 8.29  | 3.66  | 2.53  | 2.93           | 5.15            | 8.12   | 11.10           | 14.46           | 15.03  | 4y  |
| NO <sub>3</sub> <sup>-</sup>  | 11.78 | 5.93  | 3.08  | 3.32           | 6.61            | 11.16  | 16.32           | 22.06           | 22.87  | 4y  |
| OM                            | 13.18 | 4.90  | 4.61  | 5.75           | 9.28            | 12.43  | 16.94           | 21.83           | 23.63  | 4y  |
| SO <sub>4</sub> <sup>2-</sup> | 10.48 | 4.07  | 2.89  | 4.65           | 7.15            | 10.41  | 13.97           | 17.54           | 18.30  | 4y  |
| PM <sub>2.5</sub>             | 55.66 | 23.10 | 18.20 | 23.60          | 36.89           | 52.97  | 72.79           | 96.71           | 103.30 | 5y  |
| BC                            | 3.65  | 1.59  | 0.94  | 1.70           | 2.42            | 3.30   | 4.38            | 6.94            | 7.53   | 5y  |
| NH <sub>4</sub> <sup>+</sup>  | 8.32  | 3.65  | 2.49  | 2.91           | 5.18            | 8.15   | 11.26           | 14.35           | 14.98  | 5y  |
| NO <sub>3</sub> <sup>-</sup>  | 11.86 | 5.93  | 3.06  | 3.31           | 6.70            | 10.99  | 16.53           | 22.04           | 22.79  | 5y  |
| OM                            | 13.50 | 5.06  | 4.57  | 5.78           | 9.43            | 12.85  | 17.50           | 22.53           | 23.78  | 5y  |
| SO <sub>4</sub> <sup>2-</sup> | 10.70 | 4.17  | 2.87  | 4.66           | 7.24            | 10.59  | 14.34           | 17.78           | 18.71  | 5y  |

Abbreviations: BC: Black Carbon; NH<sub>4</sub><sup>+</sup>: Ammonium; NO<sub>3</sub><sup>-</sup>: Nitrate; OM: organic matter; SO<sub>4</sub><sup>2-</sup>: Sulfate.

**Table S3. The summary of the statistics of the concentration of PM<sub>2.5</sub> constitution in different region.**

| East <sup>1</sup> (µg/m <sup>3</sup> )      |       |       |       |                |                 |        |                 |                 |       |
|---------------------------------------------|-------|-------|-------|----------------|-----------------|--------|-----------------|-----------------|-------|
| Constitution                                | Mean  | SD    | Min   | P <sub>5</sub> | P <sub>25</sub> | Median | P <sub>75</sub> | P <sub>95</sub> | Max   |
| PM <sub>2.5</sub>                           | 57.24 | 22.58 | 24.52 | 25.32          | 33.78           | 59.12  | 79.46           | 86.23           | 89.85 |
| BC                                          | 2.65  | 0.80  | 1.45  | 1.53           | 1.91            | 2.53   | 3.47            | 3.80            | 3.99  |
| NH <sub>4</sub> <sup>+</sup>                | 8.40  | 3.42  | 3.49  | 3.72           | 4.72            | 9.17   | 11.46           | 13.03           | 13.39 |
| NO <sub>3</sub> <sup>2-</sup>               | 12.46 | 5.60  | 4.41  | 4.72           | 5.99            | 13.98  | 17.42           | 19.88           | 20.40 |
| OM                                          | 13.53 | 4.98  | 6.62  | 7.09           | 8.87            | 12.75  | 18.11           | 21.39           | 21.70 |
| SO <sub>4</sub> <sup>2-</sup>               | 10.52 | 3.57  | 5.08  | 5.30           | 6.88            | 11.11  | 13.98           | 15.44           | 15.95 |
| Middle <sup>2</sup> (µg/m <sup>3</sup> )    |       |       |       |                |                 |        |                 |                 |       |
| PM <sub>2.5</sub>                           | 56.40 | 16.43 | 26.93 | 31.05          | 43.68           | 54.35  | 65.67           | 86.38           | 93.27 |
| BC                                          | 2.51  | 0.59  | 1.59  | 1.60           | 2.06            | 2.31   | 2.89            | 3.54            | 3.83  |
| NH <sub>4</sub> <sup>+</sup>                | 8.93  | 2.41  | 4.07  | 4.86           | 6.80            | 8.56   | 10.74           | 12.68           | 14.03 |
| NO <sub>3</sub> <sup>2-</sup>               | 13.25 | 4.11  | 5.17  | 6.57           | 9.82            | 12.67  | 16.06           | 19.80           | 21.38 |
| OM                                          | 13.31 | 3.39  | 7.55  | 7.95           | 10.88           | 12.59  | 15.61           | 20.12           | 20.52 |
| SO <sub>4</sub> <sup>2-</sup>               | 10.62 | 2.71  | 5.56  | 6.27           | 8.60            | 10.69  | 12.30           | 15.19           | 16.61 |
| West <sup>3</sup> (µg/m <sup>3</sup> )      |       |       |       |                |                 |        |                 |                 |       |
| PM <sub>2.5</sub>                           | 36.52 | 12.77 | 19.84 | 20.41          | 23.53           | 35.41  | 44.76           | 61.46           | 62.06 |
| BC                                          | 2.03  | 0.54  | 0.98  | 1.24           | 1.60            | 1.93   | 2.38            | 2.96            | 3.05  |
| NH <sub>4</sub> <sup>+</sup>                | 5.49  | 2.37  | 2.76  | 2.85           | 3.34            | 5.11   | 7.50            | 9.84            | 10.65 |
| NO <sub>3</sub> <sup>2-</sup>               | 7.14  | 3.40  | 3.07  | 3.30           | 4.08            | 6.77   | 9.53            | 13.41           | 14.38 |
| OM                                          | 9.54  | 3.06  | 4.95  | 5.28           | 6.86            | 9.17   | 11.81           | 15.01           | 15.41 |
| SO <sub>4</sub> <sup>2-</sup>               | 7.21  | 2.59  | 3.07  | 3.87           | 5.02            | 6.43   | 9.27            | 12.40           | 12.62 |
| Northeast <sup>4</sup> (µg/m <sup>3</sup> ) |       |       |       |                |                 |        |                 |                 |       |
| PM <sub>2.5</sub>                           | 42.72 | 8.22  | 26.85 | 26.85          | 38.89           | 45.52  | 49.64           | 50.55           | 50.55 |
| BC                                          | 1.97  | 0.39  | 1.26  | 1.26           | 1.69            | 2.04   | 2.31            | 2.42            | 2.42  |
| NH <sub>4</sub> <sup>+</sup>                | 5.93  | 1.53  | 2.88  | 2.88           | 4.20            | 6.45   | 7.09            | 7.43            | 7.43  |
| NO <sub>3</sub> <sup>2-</sup>               | 8.97  | 2.50  | 3.30  | 3.30           | 6.59            | 9.76   | 10.67           | 11.38           | 11.38 |
| OM                                          | 10.00 | 2.29  | 6.22  | 6.22           | 8.14            | 10.18  | 12.21           | 12.55           | 12.55 |
| SO <sub>4</sub> <sup>2-</sup>               | 7.11  | 1.50  | 4.86  | 4.86           | 5.08            | 7.60   | 8.61            | 8.62            | 8.62  |

Notes:

<sup>1</sup>East including Beijing, Tianjin, Hebei, Shanghai, Jiangsu, Zhejiang, Fujian, Shandong, Guangdong, and Hainan.

<sup>2</sup>Middle including Shanxi, Anhui, Jiangxi, Henan, Hubei, and Hunan.

<sup>3</sup> West including Inner Mongolia, Guangxi, Chongqing, Sichuan, Guizhou, Yunnan, Xizang, Shaanxi, Gansu, Qinghai, Ningxia, and Xinjiang.

<sup>4</sup> Northeast including Liaoning, Jilin, and Heilongjiang.

Abbreviations: BC: Black Carbon; NH<sub>4</sub><sup>+</sup>: Ammonium; NO<sub>3</sub><sup>-</sup>: Nitrate; SO<sub>4</sub><sup>2-</sup>: Sulfate. OM: organic matter.

**Table S4. The association of metabolic syndrome (MetS) with an IQR incremental change in 1-year average PM<sub>2.5</sub> and its constitution in different model.**

| PM and its composition        | Different Model | Exposure window | Odds Ratio      | P value |
|-------------------------------|-----------------|-----------------|-----------------|---------|
| PM <sub>2.5</sub>             | Crude Model     | 1y              | 1.23(1.16,1.3)  | <0.001  |
| PM <sub>2.5</sub>             | Model II        | 1y              | 1.25(1.16,1.34) | <0.001  |
| PM <sub>2.5</sub>             | Model III       | 1y              | 1.27(1.17,1.37) | <0.001  |
| PM <sub>2.5</sub>             | Model IV        | 1y              | 1.27(1.17,1.37) | <0.001  |
| PM <sub>2.5</sub>             | Model V         | 1y              | 1.27(1.17,1.37) | <0.001  |
| BC                            | Crude Model     | 1y              | 1.2(1.14,1.27)  | <0.001  |
| BC                            | Model II        | 1y              | 1.23(1.15,1.32) | <0.001  |
| BC                            | Model III       | 1y              | 1.25(1.16,1.36) | <0.001  |
| BC                            | Model IV        | 1y              | 1.25(1.15,1.36) | <0.001  |
| BC                            | Model V         | 1y              | 1.25(1.16,1.36) | <0.001  |
| NH <sub>4</sub> <sup>+</sup>  | Crude Model     | 1y              | 1.15(1.09,1.22) | <0.001  |
| NH <sub>4</sub> <sup>+</sup>  | Model II        | 1y              | 1.18(1.1,1.27)  | <0.001  |
| NH <sub>4</sub> <sup>+</sup>  | Model III       | 1y              | 1.21(1.12,1.31) | <0.001  |
| NH <sub>4</sub> <sup>+</sup>  | Model IV        | 1y              | 1.21(1.12,1.31) | <0.001  |
| NH <sub>4</sub> <sup>+</sup>  | Model V         | 1y              | 1.21(1.12,1.31) | <0.001  |
| NO <sub>3</sub> <sup>-</sup>  | Crude Model     | 1y              | 1.19(1.13,1.26) | <0.001  |
| NO <sub>3</sub> <sup>-</sup>  | Model II        | 1y              | 1.22(1.13,1.31) | <0.001  |
| NO <sub>3</sub> <sup>-</sup>  | Model III       | 1y              | 1.25(1.15,1.35) | <0.001  |
| NO <sub>3</sub> <sup>-</sup>  | Model IV        | 1y              | 1.24(1.14,1.35) | <0.001  |
| NO <sub>3</sub> <sup>-</sup>  | Model V         | 1y              | 1.25(1.15,1.35) | <0.001  |
| OM                            | Crude Model     | 1y              | 1.2(1.14,1.27)  | <0.001  |
| OM                            | Model II        | 1y              | 1.22(1.14,1.31) | <0.001  |
| OM                            | Model III       | 1y              | 1.25(1.15,1.35) | <0.001  |
| OM                            | Model IV        | 1y              | 1.25(1.15,1.35) | <0.001  |
| OM                            | Model V         | 1y              | 1.25(1.15,1.35) | <0.001  |
| SO <sub>4</sub> <sup>2-</sup> | Crude Model     | 1y              | 1.17(1.1,1.24)  | <0.001  |
| SO <sub>4</sub> <sup>2-</sup> | Model II        | 1y              | 1.19(1.11,1.29) | <0.001  |
| SO <sub>4</sub> <sup>2-</sup> | Model III       | 1y              | 1.23(1.13,1.33) | <0.001  |
| SO <sub>4</sub> <sup>2-</sup> | Model IV        | 1y              | 1.22(1.12,1.33) | <0.001  |
| SO <sub>4</sub> <sup>2-</sup> | Model V         | 1y              | 1.22(1.12,1.33) | <0.001  |

Notes: Crude Model: No adjustment. Model II: Crude Model+ age, sex, urbanicity, educational level, marriage status, physical activity. Model III: Model II+ cooking fuel type, heating fuel type. Model IV: Model III+ smoke. Mode V (Fully Model): Model IV+ drinking. Abbreviations: BC: Black Carbon; NH<sub>4</sub><sup>+</sup>: Ammonium; NO<sub>3</sub><sup>-</sup>: Nitrate; OM: organic matter; SO<sub>4</sub><sup>2-</sup>: Sulfate.

**Table S5. The association of metabolic syndrome (MetS) with an IQR incremental change in PM<sub>2.5</sub> and its constitution in different exposure window.**

| PM and its composition        | Exposure Window | Odds Ratio      | P value |
|-------------------------------|-----------------|-----------------|---------|
| PM <sub>2.5</sub>             | 1y              | 1.27(1.17,1.37) | <0.001  |
| PM <sub>2.5</sub>             | 2y              | 1.25(1.16,1.35) | <0.001  |
| PM <sub>2.5</sub>             | 3y              | 1.26(1.16,1.36) | <0.001  |
| PM <sub>2.5</sub>             | 4y              | 1.25(1.16,1.35) | <0.001  |
| PM <sub>2.5</sub>             | 5y              | 1.16(1.04,1.30) | <0.001  |
| BC                            | 1y              | 1.25(1.16,1.36) | <0.001  |
| BC                            | 2y              | 1.25(1.15,1.36) | <0.001  |
| BC                            | 3y              | 1.24(1.14,1.35) | <0.001  |
| BC                            | 4y              | 1.24(1.14,1.36) | <0.001  |
| BC                            | 5y              | 1.21(1.14,1.29) | <0.001  |
| NH <sub>4</sub> <sup>+</sup>  | 1y              | 1.21(1.12,1.31) | <0.001  |
| NH <sub>4</sub> <sup>+</sup>  | 2y              | 1.22(1.12,1.32) | <0.001  |
| NH <sub>4</sub> <sup>+</sup>  | 3y              | 1.22(1.12,1.33) | <0.001  |
| NH <sub>4</sub> <sup>+</sup>  | 4y              | 1.21(1.11,1.32) | <0.001  |
| NH <sub>4</sub> <sup>+</sup>  | 5y              | 1.21(1.11,1.32) | <0.001  |
| NO <sub>3</sub> <sup>-</sup>  | 1y              | 1.25(1.15,1.35) | <0.001  |
| NO <sub>3</sub> <sup>-</sup>  | 2y              | 1.25(1.15,1.36) | <0.001  |
| NO <sub>3</sub> <sup>-</sup>  | 3y              | 1.25(1.15,1.36) | <0.001  |
| NO <sub>3</sub> <sup>-</sup>  | 4y              | 1.24(1.14,1.35) | <0.001  |
| NO <sub>3</sub> <sup>-</sup>  | 5y              | 1.24(1.14,1.35) | <0.001  |
| OM                            | 1y              | 1.25(1.15,1.35) | <0.001  |
| OM                            | 2y              | 1.24(1.15,1.34) | <0.001  |
| OM                            | 3y              | 1.25(1.15,1.36) | <0.001  |
| OM                            | 4y              | 1.25(1.15,1.36) | <0.001  |
| OM                            | 5y              | 1.24(1.14,1.35) | <0.001  |
| SO <sub>4</sub> <sup>2-</sup> | 1y              | 1.22(1.12,1.33) | <0.001  |
| SO <sub>4</sub> <sup>2-</sup> | 2y              | 1.21(1.12,1.32) | <0.001  |
| SO <sub>4</sub> <sup>2-</sup> | 3y              | 1.22(1.12,1.33) | <0.001  |
| SO <sub>4</sub> <sup>2-</sup> | 4y              | 1.22(1.11,1.33) | <0.001  |
| SO <sub>4</sub> <sup>2-</sup> | 5y              | 1.22(1.11,1.33) | <0.001  |

Notes: The model was adjusted for age, sex, urbanicity, educational level, marriage status, smoke, drinking, cooking fuel type, heating fuel type, and physical activity. Abbreviations: BC: Black Carbon; NH<sub>4</sub><sup>+</sup>: Ammonium; NO<sub>3</sub><sup>-</sup>: Nitrate; OM: organic matter; SO<sub>4</sub><sup>2-</sup>: Sulfate. Lag1 refers to the average exposure concentration of the previous year from the date of investigation.

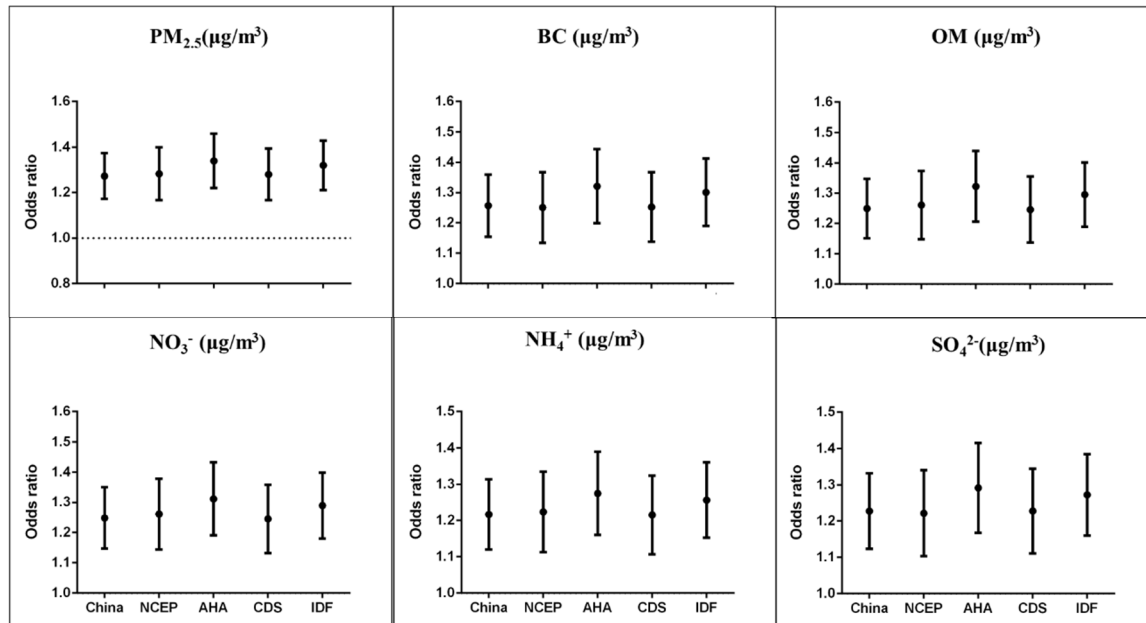

**Figure S1. The association of metabolic syndrome (MetS) with an IQR incremental change in 1-year average PM<sub>2.5</sub> and its constitution by different definition.** The bars show main effect estimates and 95% confidence intervals. The model was adjusted for age, sex, urbanicity, educational level, marriage status, smoke, drinking, cooking fuel type, heating fuel type, and physical activity. Abbreviations: BC: Black Carbon; NH<sub>4</sub><sup>+</sup>: Ammonium; NO<sub>3</sub><sup>-</sup>: Nitrate; OM: organic matter; SO<sub>4</sub><sup>2-</sup>: Sulfate. NCEP, the US National Cholesterol Education Programme; AHA, American Heart Association; CDS, Chinese Diabetes Society; IDF, the International Diabetes Federation.
